# Supplementary material
Source: Research Square preprint supplement (doi:10.21203/rs.3.rs-9731096/v1)
Supplement: Supplementary file 1 [file 8699054ec4b6b3d0242232ab.docx]

Table 1 Sequences of miR-125a-3p mimics and miR-125a-3p inhibitors

| Name | Sequence |
| --- | --- |
| miR-125a-3p mimics sense（5'- 3'） | ACAGGUGAGGUUCUUGGGAGCC |
| miR-125a-3p mimics antisense（5'- 3'） | CUCCCAAGAACCUCACCUGUUU |
| Mimics NC sense（5'- 3'） | UCACAACCUCCUAGAAAGAGUAGA |
| Mimics NC antisense（5'- 3'） | UCUACUCUUUCUAGGAGGUUGUGA |
| miR-125a-3p inhibitor sense（5'- 3'） | GGCUCCCAAGAACCUCACCUGU |
| inhibitor NC sense（5'- 3'） | UCUACUCUUUCUAGGAGGUUGUGA |
